# Supplementary material
Source: PubMed Central journal article supplement (PMC6226009)

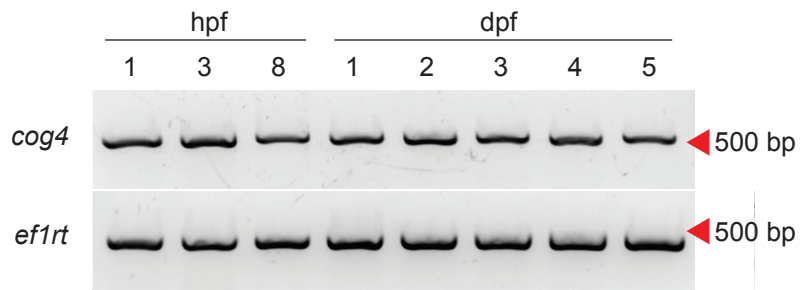

Supplement: NIHMS1509957-supplement-3.pdf [file NIHMS1509957-supplement-3.pdf]

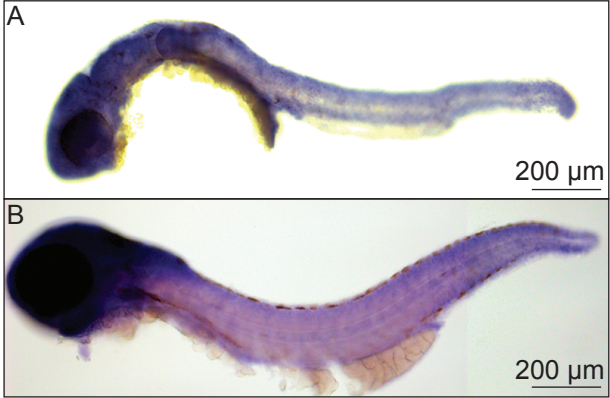

Supplement: NIHMS1509957-supplement-4.pdf [file NIHMS1509957-supplement-4.pdf]

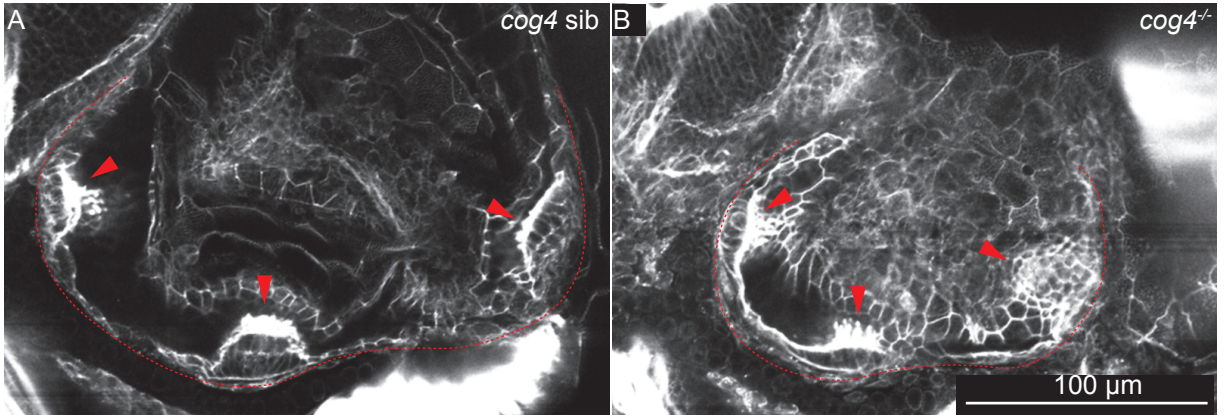

Supplement: NIHMS1509957-supplement-5.pdf [file NIHMS1509957-supplement-5.pdf]

Experiment 1

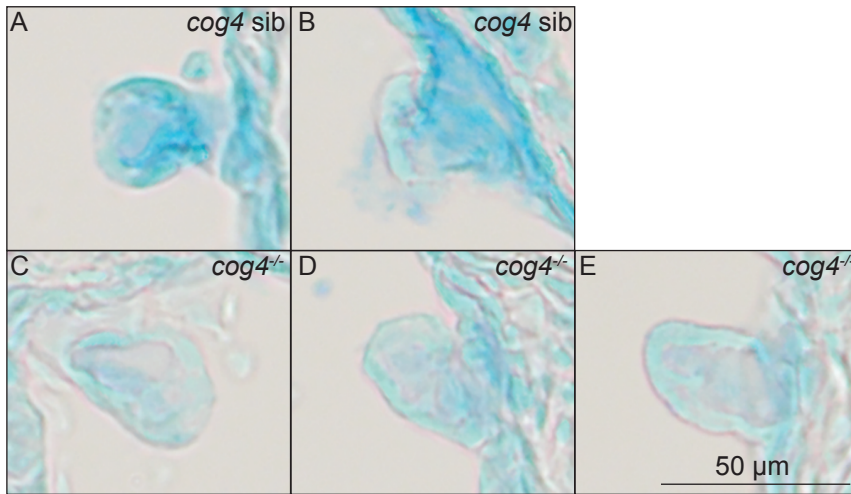

Experiment 2

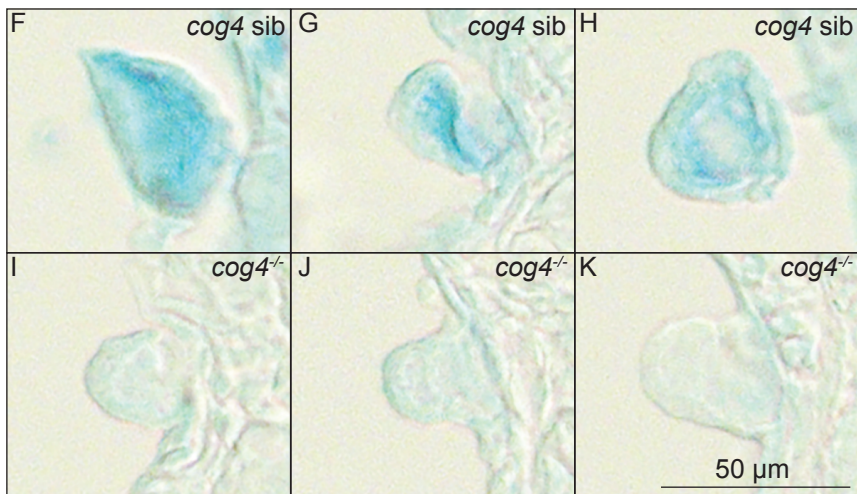

Supplement: NIHMS1509957-supplement-6.pdf [file NIHMS1509957-supplement-6.pdf]

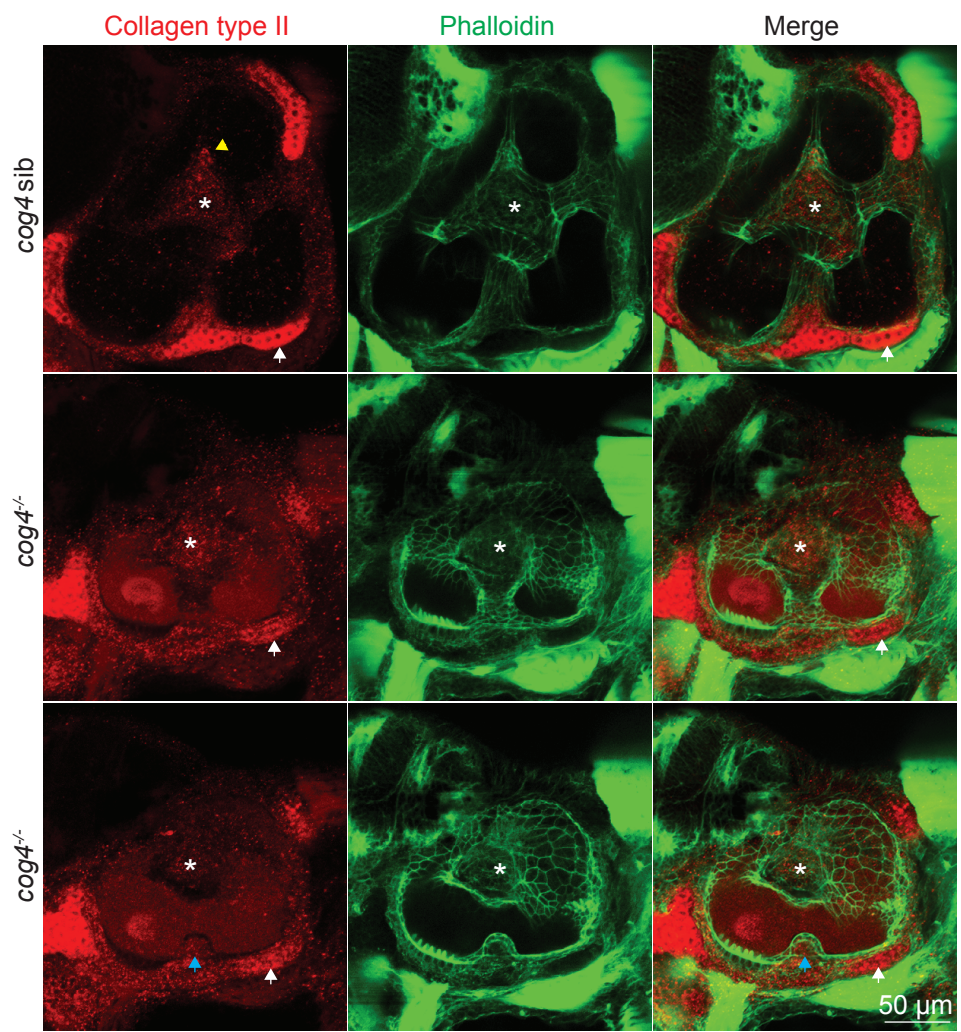

Supplement: NIHMS1509957-supplement-7.pdf [file NIHMS1509957-supplement-7.pdf]
